# Supplementary material for: Correlation between surface state and band edge emission of white light ZnxCd1−xS nanocrystals
Source: Royal Society of Chemistry journal article supplement (doi:10.1039/c4tc00076e), 2014-01-01
Supplement: c4tc00076e1.pdf [file c4tc00076e1.pdf]

## Supplementary Information

### Correlation between surface state and band edge emission of white light $\text{Zn}_x\text{Cd}_{1-x}\text{S}$ nanocrystals

Hong-Shuo Chen,<sup>a</sup> Kuan-Wen Wang,<sup>a,\*</sup> Tsan-Yao Chen<sup>b</sup> and Shu-Ru  
Chung<sup>c,\*</sup>

<sup>a</sup> Institute of Materials Science and Engineering, National Central University

Taoyuan 32001, Taiwan

<sup>b</sup> Department of Engineering and System Science, National Tsing Hua University,

Hsinchu 30013, Taiwan

<sup>c</sup> Department of Materials Science and Engineering, National Formosa University,

Yunlin 63201, Taiwan.

\*To whom correspondence should be addressed,

E-mail: kuanwen.wang@gmail.com

Fax: 886-3-2805034, Tel: 886-3-4227151 ext 34906

Current address: Institute of Materials Science and Engineering, National Central  
University, No.300, Jhongda Rd., Taoyuan 32001, Taiwan.

## Experimental Procedure

Cadmium oxide (CdO, 99.998 %) was purchased from Alfa Aesar. Zinc oxide (ZnO, 99.999 %), stearic acid (SA, 99 %), sulfur powder (S, 99.98 %), octadecene (ODE, 90 %), hexyldecylamine (HDA, 90 %), and trioctylphosphine oxide (TOPO, 90 %) were obtained by Aldrich. Hexane (99.7 %) and methanol (99 %) were gotten from Mallinckrodt Chemicals. All chemicals were used as received without further purification.

A series of colloidal ternary semiconductor  $Zn_xCd_{1-x}S$  ( $x=0, 0.2, 0.4, 0.5, 0.7, 0.8, 0.9$  and  $1$ , named as  $Zn_x$ ) NCs is prepared by thermal pyrolyzed organometallic route. Total amount of  $0.3$  mmol of CdO and ZnO were mixed with stearic acid (SA), which as complex reagent, in a three-necked flask and then heated to  $230$  °C under Ar flow until a clear solution was formed to prepare the cadmium/zinc-SA precursor. The solution was then allowed to cool down to room temperature, and a white solid precipitate was obtained. After cadmium/zinc-SA precursor was formed, the mixture solvent,  $15$  mmol of TOPO and  $24$  mmol of HDA, was added into three-necked flask and stirred together under Ar at room temperature for  $5$  min, then reheated the sample up to  $320$  °C to form a transparency solution. At this temperature, S-ODE precursor, which was  $1.5$  mmol of sulfur dissolved in  $4$  mL of ODE, was swiftly injected into three-neck flask. The nuclei formed quickly and take out the samples under desire growth time. After the reaction was complete (about  $60$  min), the mixed solution was swiftly cooled down to  $150$  °C to stop reaction. Samples were precipitated with hot anhydrous methanol for purification. The precipitate was dissolved in hexane to remove unreacted reagents and excess TOPO or HDA and for further measure.

The optical properties of samples were measured by Fluorescence Spectrophotometer (FL, Hitachi F-7000) and UV-Vis spectrometer (UV-Vis, Jasco V-670 spectrometer), respectively. Relative QY of samples were determined by comparing the area under the curve of FL emission for the  $Zn_xCd_{1-x}S$  NCs with that of fluorescent dye (Rhodamine 101 in ethanol). Both of sample and reference are have the same absorbance under the same absorption wavelength. X-ray diffraction (XRD) patterns were recorded on a MacScience Co. Ltd MO3X-HF<sup>22</sup> powder diffractometer with Cu  $K_\alpha$  ( $\lambda = 1.542$  Å) as the incident radiation. Transmission electron microscope (HRTEM, JEOL JEM-2010) was used to analyze the particle size and more than  $100$  particles was count to measure the size distribution of samples. The compositions of NCs were conducted by X-ray photoelectron spectroscopy (XPS, Thermo VG Scientific Sigma Probe) using an Al  $K_\alpha$  radiation was used to study the surface compositions of  $Zn_xCd_{1-x}S$  NCs. All binding energies were calibrated with respect to the C  $1s$  line at  $284.6$  eV. The surface compositions of  $Zn_xCd_{1-x}S$  NCs were estimated by calculating the integral of each peak. The exact chemical compositions of the obtained  $Zn_xCd_{1-x}S$  NCs were measured by inductively coupled plasma – atomic emission spectrometer (ICP-AES, France Horiba JobinYvon JY2000-2) using a standard HCl/HNO<sub>3</sub> digestion.

The typical XAS spectra of various NCs were obtained in fluorescence mode at the BL01C1 beamline at the National Synchrotron Radiation Research Center (NSRRC). The incident beam was monochromated using a double crystal monochromator equipped with Si (111) crystal. Si

monochromator was employed to adequately select the energy with a resolution  $\Delta E/E$  better than  $1 \times 10^{-4}$  at the Cd K-edge (26711 eV) and Zn K-edge (9659 eV). In general, all NCs were dispersed uniformly on the tape and prepared as thin pellets with an appropriate absorption thickness ( $\mu_x = 1.0$ , where  $\mu$  is the absorption edge and  $x$  is the thickness of the sample) so as to attain the proper edge jump step at the absorption edge region. In order to acquire acceptable-quality spectra, each XAS measurement was repeated at least twice and averaged for successive comparison. Moreover, the ionization chamber filled with different mixing gases such as Ar, N<sub>2</sub>, He or Kr was used to detect the intensities of the incident beam ( $I_0$ ), the fluorescence beam ( $I_f$ ) and the beam finally transmitted by the reference foil ( $I_r$ ). For the EXAFS analysis, the backgrounds of pre-edge and post-edge were subtracted and normalized with respect to the edge jump step from the XAS spectra ( $\chi(E)$ ). The normalized  $\chi(E)$  spectra were transformed from energy to k-space and further weighted by  $k^3$  to distinguish the contributions of back scattering interferences from different coordination shells. Subsequently, the extracted  $k^3$ -weighted spectra in k-space ranging from 3.0 to 12.9 and 3.3 to 13.0  $\text{\AA}^{-1}$  for the Cd K-edge and Zn-edge were Fourier transformed into r-space, respectively. The phase correction was set on all spectra in the r-space. Finally, the filtered EXAFS data of Cd K-edge were analyzed by a nonlinear least-squares curve fitting method in the r-space ranging from 1.0 to 2.7  $\text{\AA}^{-1}$  depending on the bond to be fitted. The reference phase and amplitude for the Cd-O coordination were initially acquired from a CdO powder. Normally, the backscattered amplitude and phase shift functions for specific atom pairs were theoretically estimated by manner of utilizing the FEFF7 code.<sup>36</sup> In addition, the reduction amplitude ( $S_{02}$ ) value for Cd was fixed at 0.83 in order to determine various structural parameters for each bond pairs.

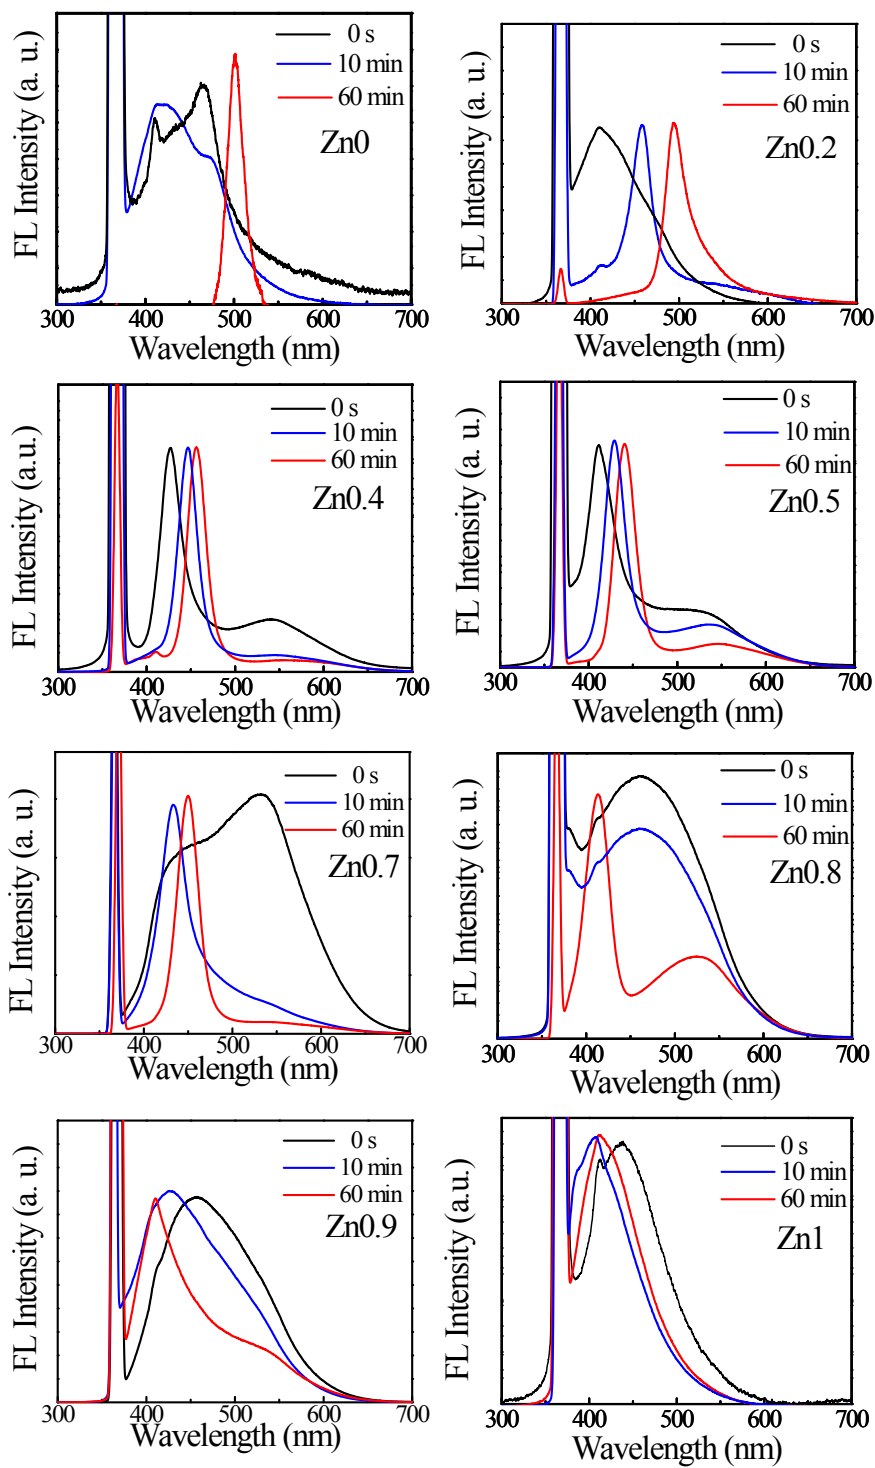

Figure S1 Temporal evolution of Fluorescence spectra of  $Zn_x$  NCs. ( $\lambda_{ex} = 365$  nm)

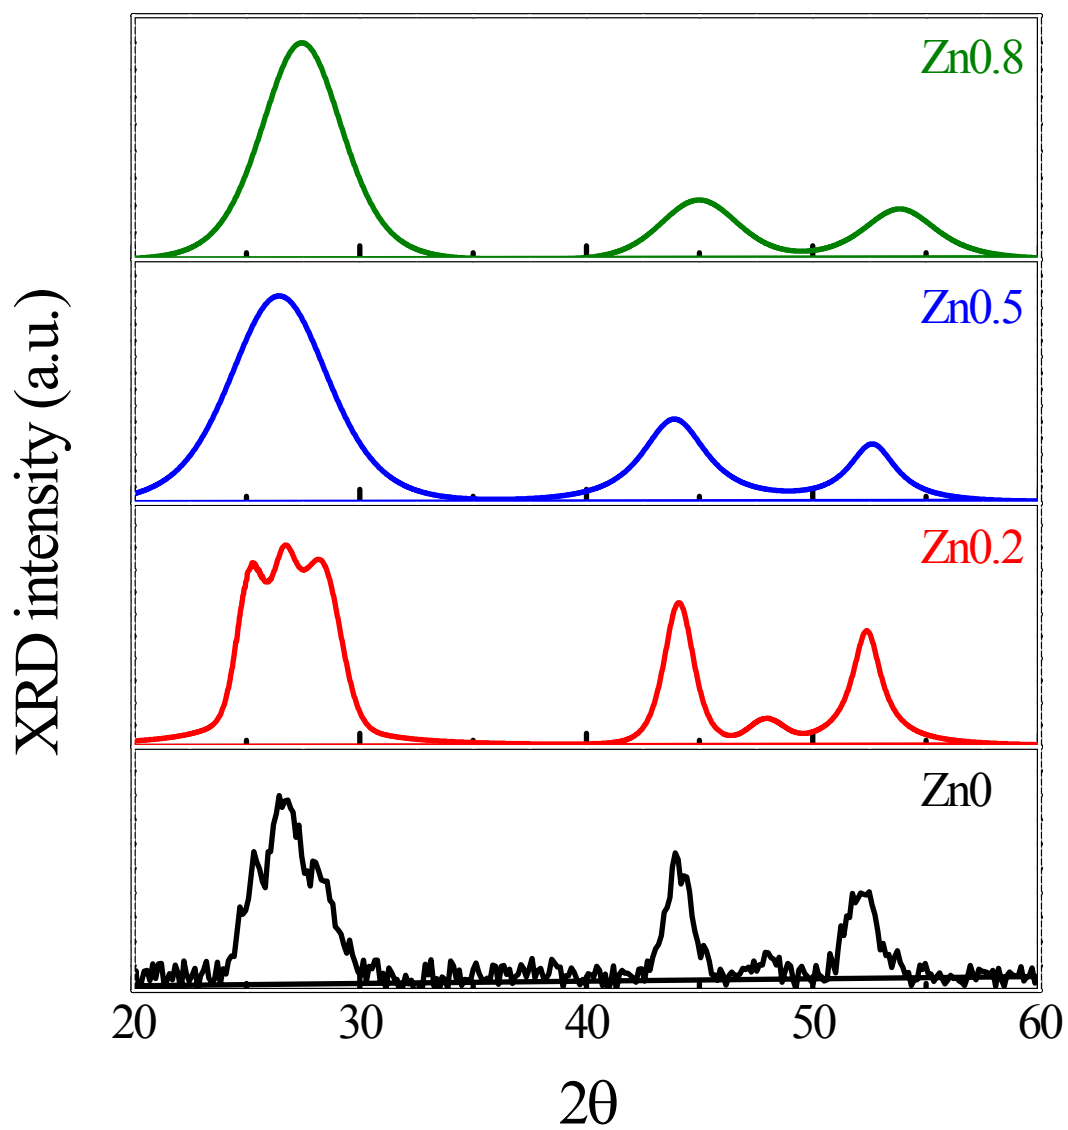

Figure S2 XRD patterns of Zn<sub>x</sub> NCs

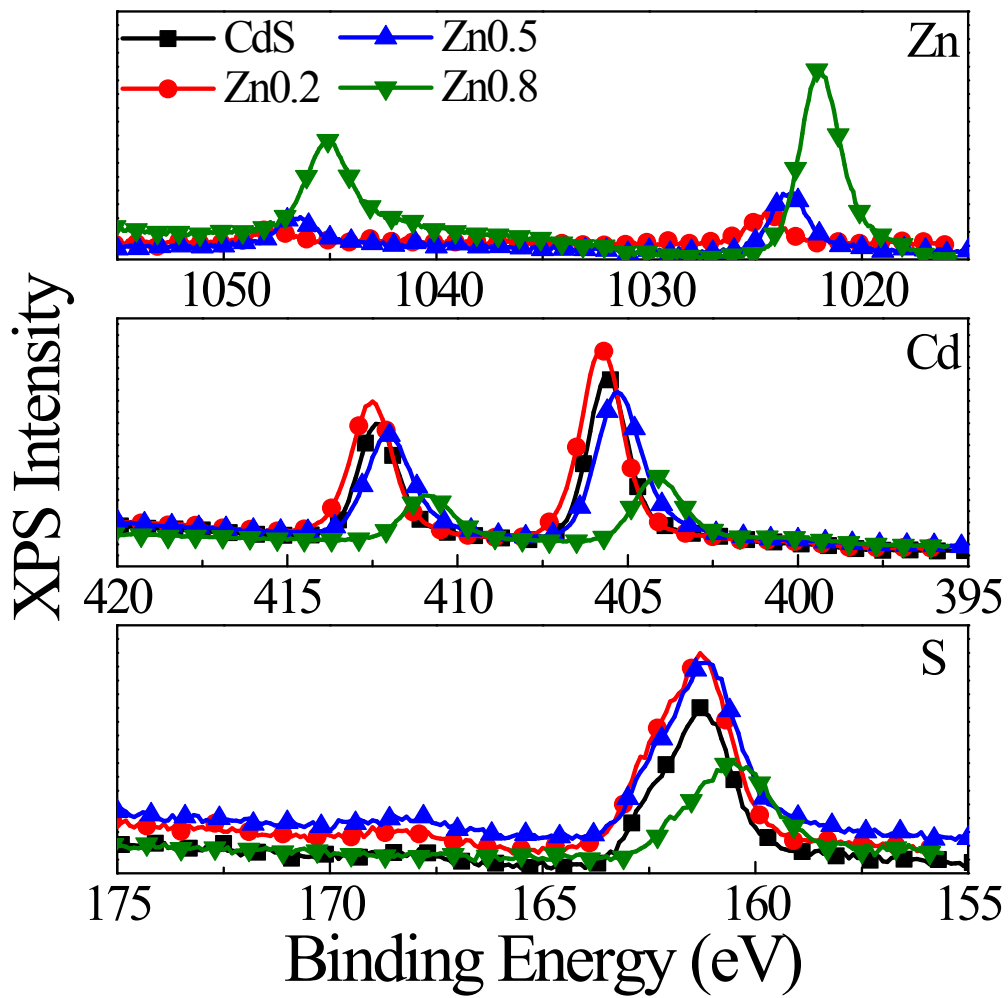

Figure S3 XPS spectra of Zn<sub>x</sub> NCs

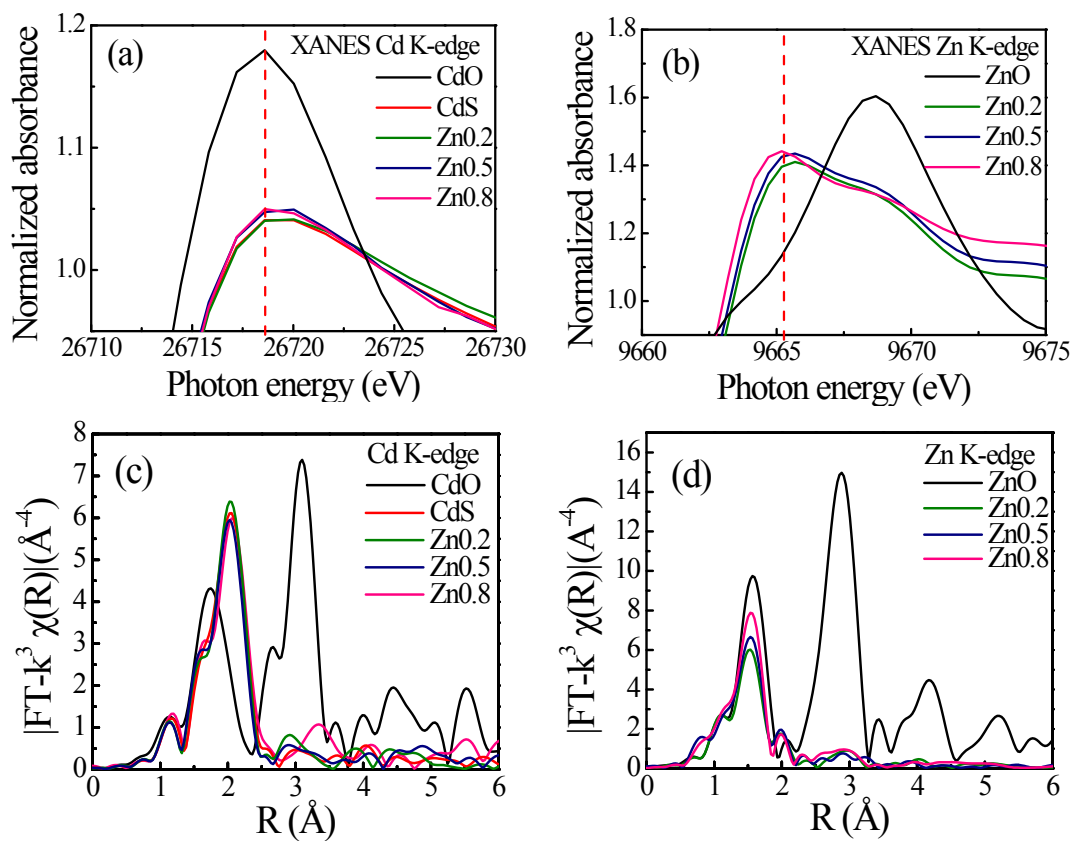

Figure S4 The XANES patterns of Zn<sub>x</sub>Cd<sub>1-x</sub>S NCs at (a) Cd K-edge and (b) Zn K-edge, the Fourier Transformed radial structure functions of Zn<sub>x</sub>Cd<sub>1-x</sub>S NCs at (c) Cd K-edge and (d) Zn K-edge.

Table S1. Physical and optical properties of  $Zn_xCd_{1-x}S$  NCs reacts for 60 min

| Nominal composition | Emission wavelength (nm) | Particle size <sup>[a]</sup> (nm) | QY (%) | Emission range (nm) |
|---------------------|--------------------------|-----------------------------------|--------|---------------------|
| CdS                 | 500                      | -                                 | 1      | 469-540             |
| Zn0.2               | 493                      | 7.1                               | 4      | 466-580             |
| Zn0.4               | 456, 566*                | -                                 | 21     | 420-700             |
| Zn0.5               | 440, 546*                | 3.6                               | 26     | 416-700             |
| Zn0.7               | 428, 541*                | -                                 | 42     | 410-700             |
| Zn0.8               | 411, 523*                | 3.1                               | 56     | 380-700             |
| Zn0.9               | 410, 485*                | -                                 | 27     | 377-700             |
| ZnS                 | 410                      | -                                 | -      | -                   |

[\*] Surface state emission

[a] HRTEM characterization



Table S2 EXAFS fitting parameters of the Cd K-edge and Zn K-edge for the  $Zn_xCd_{1-x}S$  NCs.

**Cd K-edge**

| Sample | Path  | CN <sup>a</sup> | R <sup>b</sup> (Å) | $\sigma^2 (\times 10^{-3})^c (\text{Å}^2)$ | $\Delta E_0^d$ (eV) |
|--------|-------|-----------------|--------------------|--------------------------------------------|---------------------|
| CdO    | Cd-O  | 4.4             | 2.28               | 0.008                                      | 1.7                 |
|        | Cd-Cd | 7.1             | 3.33               |                                            |                     |
| CdS    | Cd-O  | 1.2             | 2.22               | 0.003                                      | 16.0                |
|        | Cd-S  | 4.9             | 2.39               |                                            |                     |
| Zn0.2  | Cd-O  | 1.1             | 2.22               | 0.003                                      | 17.6                |
|        | Cd-S  | 4.2             | 2.39               |                                            |                     |
| Zn0.5  | Cd-O  | 1.3             | 2.22               | 0.003                                      | 15.8                |
|        | Cd-S  | 4.1             | 2.39               |                                            |                     |
| Zn0.8  | Cd-O  | 1.6             | 2.22               | 0.003                                      | 17.1                |
|        | Cd-S  | 4.2             | 2.39               |                                            |                     |

**Zn K-edge**

| Sample | Path  | CN <sup>a</sup> | R <sup>b</sup> (Å) | $\sigma^2 (\times 10^{-3})^c (\text{Å}^2)$ | $\Delta E_0^d$ (eV) |
|--------|-------|-----------------|--------------------|--------------------------------------------|---------------------|
| ZnO    | Zn-O  | 4.8             | 1.99               | 0.006                                      | -0.2                |
|        | Zn-Zn | 9.6             | 3.21               |                                            |                     |
| Zn0.2  | Zn-O  | 2.1             | 1.95               | 0.003                                      | -1.0                |
|        | Zn-Zn | 0.4             | 2.28               |                                            |                     |
| Zn0.5  | Zn-O  | 2.1             | 1.95               | 0.003                                      | 0.4                 |
|        | Zn-Zn | 0.4             | 2.30               |                                            |                     |
| Zn0.8  | Zn-O  | 2.4             | 1.95               | 0.003                                      | 17.1                |
|        | Zn-Zn | 0.3             | 2.30               |                                            |                     |

<sup>a</sup> CN: coordination number, <sup>b</sup> R: bond distance, <sup>c</sup>  $\sigma^2$ : Debye-Waller factor, <sup>d</sup>  $\Delta E_0$ : inner potential correction.

**Table S3** ICP, TEM and XPS characterizations of  $Zn_xCd_{1-x}S$  NCs.

| Sample<br>s | Chemical<br>compositions | d-spacing<br>(nm) | Binding energy<br>(eV) |                      | Surface<br>compositions |
|-------------|--------------------------|-------------------|------------------------|----------------------|-------------------------|
|             | Cd:Zn                    |                   | Cd 3d <sub>5/2</sub>   | Zn 2p <sub>3/2</sub> | Cd:Zn                   |
| CdS         | 100:0                    | 0.335             | 405.7                  | NA                   | 100:0                   |
| Zn0.2       | 92:8                     | 0.337             | 405.8                  | 1024.5               | 95:5                    |
| Zn0.5       | 78:22                    | 0.328             | 405.3                  | 1023.5               | 88:12                   |
| Zn0.8       | 66:34                    | 0.323             | 404.2                  | 1022.0               | 42:58                   |
